# Supplementary material
Source: PubMed Central journal article supplement (PMC9808607)
Supplement: NIHMS1857675-supplement-1.pdf [file NIHMS1857675-supplement-1.pdf]

## 572 eSupplement

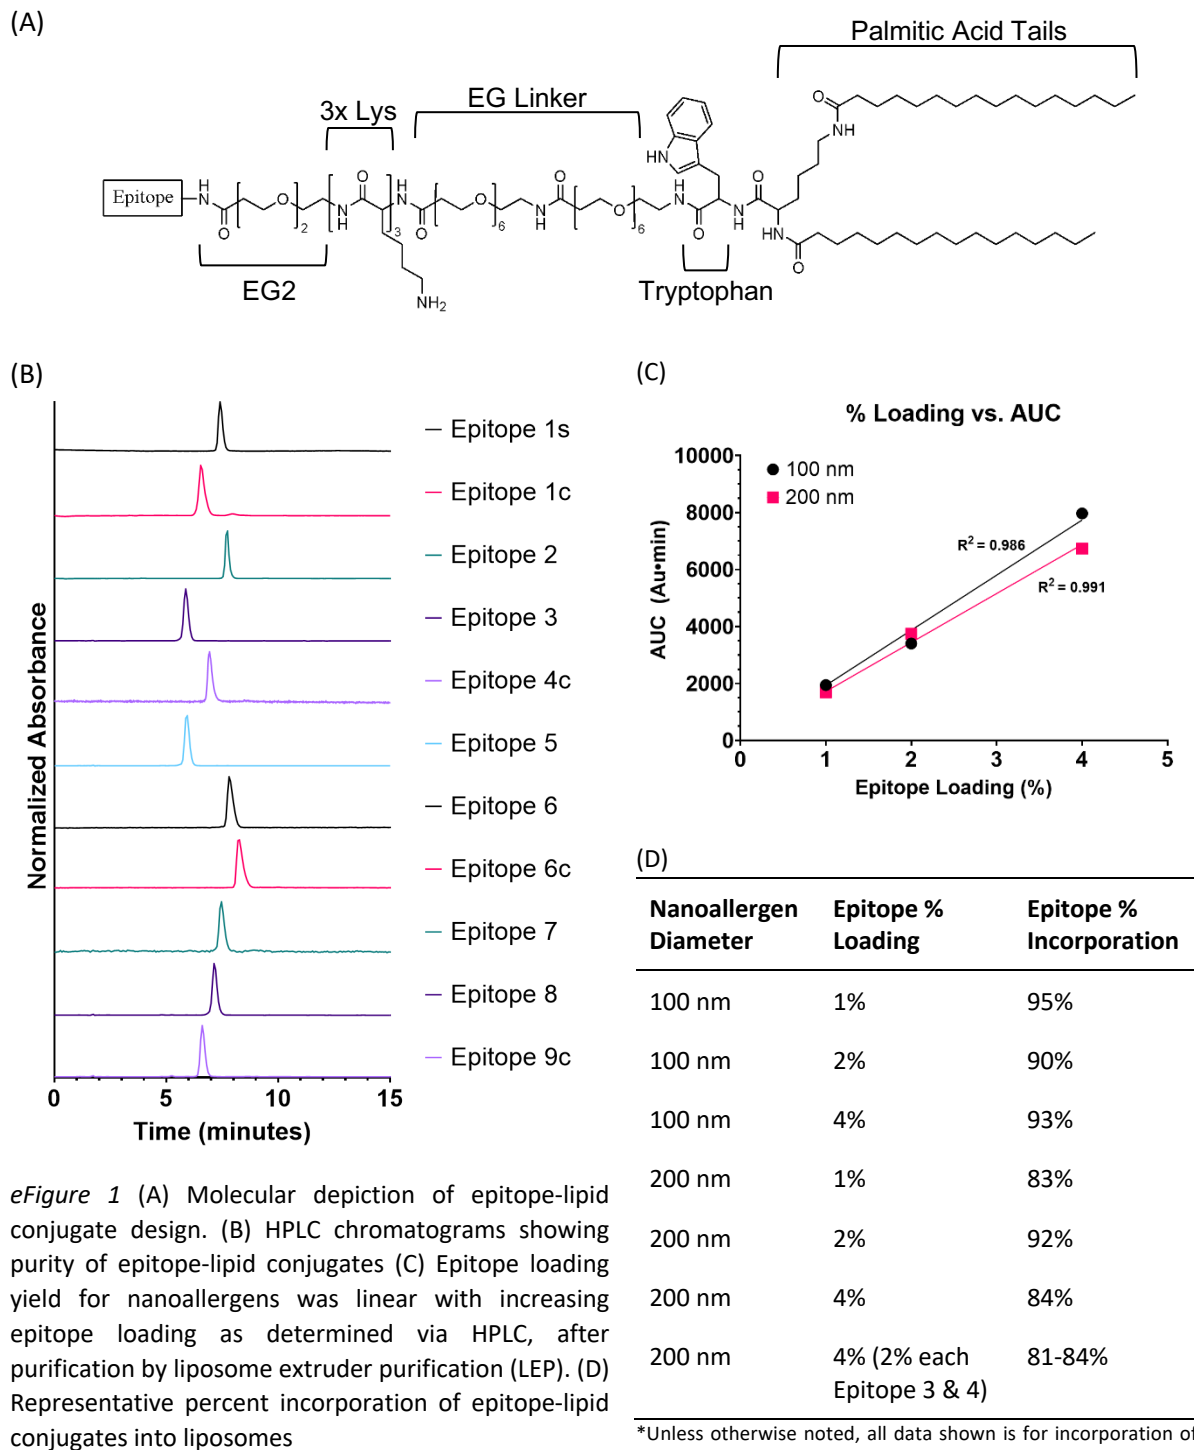

*eFigure 1* (A) Molecular depiction of epitope-lipid conjugate design. (B) HPLC chromatograms showing purity of epitope-lipid conjugates (C) Epitope loading yield for nanoallergens was linear with increasing epitope loading as determined via HPLC, after purification by liposome extruder purification (LEP). (D) Representative percent incorporation of epitope-lipid conjugates into liposomes

\*Unless otherwise noted, all data shown is for incorporation of epitope 3. Epitope % Loading is stoichiometric percent of total lipids. Epitope % Incorporation is based on AUC from HPLC chromatogram of epitope-lipid:  $(\text{AUC Post-LEP})/(\text{AUC Pre-LEP}) \times 100\%$

574 *eTable 1. Mass spectrometry characterization of epitope-lipid conjugates*

| <b>Epitope</b> | <b>Expected</b> | <b>Found</b> | <b>Notes</b> |
|----------------|-----------------|--------------|--------------|
| 1s             | 2802.8          | 2803.8       | linear       |
| 1c             | 4030.4          | 4032.5       | cyclized     |
| 2              | 2902.8          | 2903.8       | cyclized     |
| 3              | 3108.0          | 3108.0       | linear       |
| 4              | 4096.4          | 4097.5       | cyclized     |
| 5              | 3086.0          | 3086.0       | linear       |
| 6              | 3048.9          | 3049.8       | linear       |
| 6c             | 2839.7          | 2840.8       | cyclized     |
| 7              | 4101.3          | 4103.3       | cyclized     |
| 8              | 3404.3          | 3404.1       | linear       |
| 9              | 3213.2          | 3213.0       | cyclized     |

575

576

577

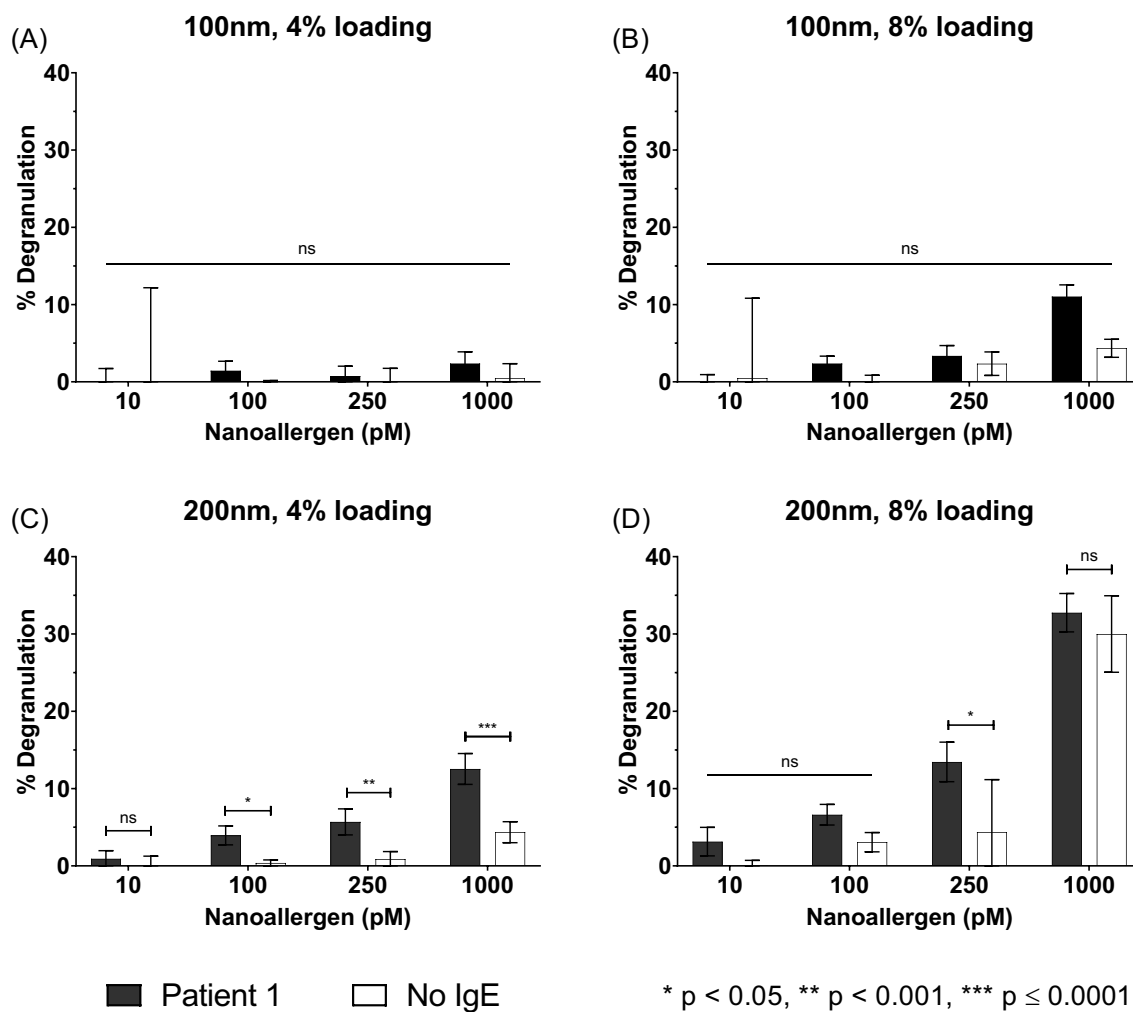

578

579 eFigure 2. Nanoallergens loaded with epitopes 1c, 3, 4, & 8 (combination-2) used to determine optimal size and total  
 580 percent loading of nanoallergens.

581

582
